# Supplementary material for: Chronometabolism: The Timing of the Consumption of Meals Has a Greater Influence Than Glycemic Index (GI) on the Postprandial Metabolome
Source: MDPI journal article supplement (doi:10.3390/metabo13040490), 2023-03-29
Supplement: s1 [file s1]

## Supplementary Methods

### Metabolite peak integration

During peak integration, all analytes were normalized to the peak height of their mapping ISTD. To perform this, in MRMKit parameter setting, “ISTD\_trace\_all” was set to 1, “normalize” was set to 1 [1]. MRMKit would then scale the analyte peak to the corresponding ISTD peak, the intensity output of each analyte was calculated as below:

$$\text{Analyte Intensity} = \frac{\text{Analyte peak height}}{\text{ISTD peak height}} \quad (1)$$

The intensity values would then be included in the initial data for down-stream statistical analysis.

### Column-specific batch correction

Our assay was performed by using 2 columns with column-switching mode, therefore column-specific batch effect would exist in addition to common batch effect. We hereby applied column-specific batch correction, during which each column would be treated as a separate batch. There would be different initial batches for different runs, while within each initial batch/run, there would also be 2 different batches because they were measured by 2 columns. Finally, the number of batches input to MRMKit for processing would be double the number of actual runs. Then with “batch\_correction” set to 1 in MRMKit, the column-specific batch correction would be performed.

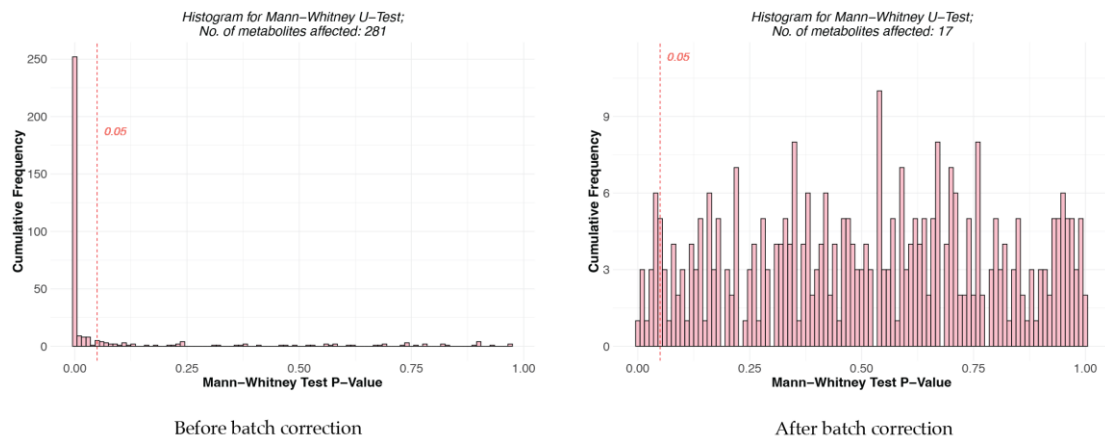

(a). *p*-value distribution of average intensity comparison for metabolites measured in 2 columns (left: before batch correction; right: after batch).

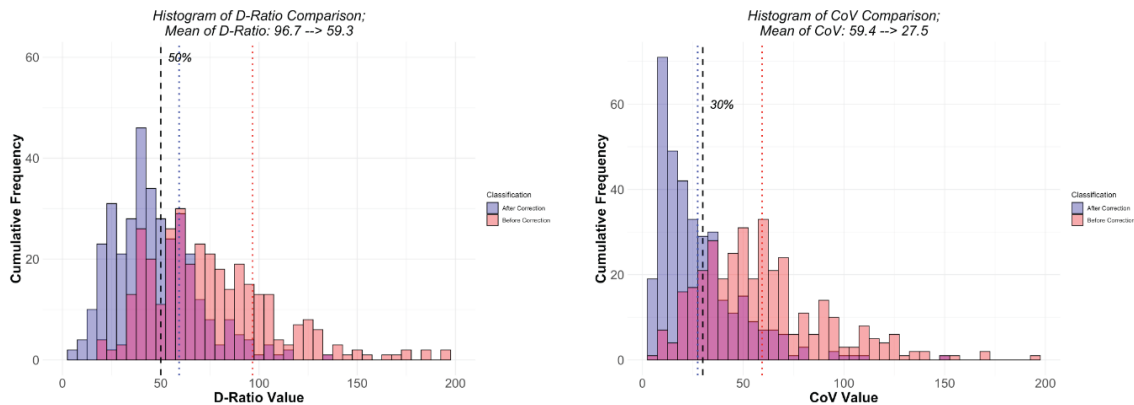

(b). Distribution of metabolites' CoV and D-ratio before and after batch correction (left: D-ratio distribution; right: CoV distribution).

**Figure S1 (a).** *p*-value distribution of average intensity comparison for metabolites measured in 2 columns (left: before batch correction; right: after batch). **(b).** Distribution of metabolites' CoV and D-ratio before and after batch correction (left: D-ratio distribution; right: CoV distribution).

To check whether this batch correction method improved data quality, we observed the average intensity comparison result of same analytes measured by the 2 columns before and after batch correction. As shown in Figure S1 (a), before batch correction, most of the *p*-values were less than 0.05, indicating that there're significant difference between the 2 columns. While after the correction, the *p*-values were more evenly distributed, showing that this column-specific batch correction did decrease the batch effect caused by using different columns. Analytes' CoV and D-ratio also improved after correction (Figure S1 (b)).

#### *Quality control by CoV and D-ratio*

Data quality control was performed by (1) calculating coefficient of variation (CoV), dispersion ratio (D-ratio) [2] (2) filtering out low-quality data based on CoV and D-ratio threshold. For each indicated batch, CoV was calculated as:

$$CoV = \frac{\text{Standard Deviation (SD) across all pooled samples}}{\text{Mean across all pooled samples}} \quad (2)$$

which indicates the internal variance of repeated measurements.

D-ratio was calculated as:

$$D - ratio = \frac{\text{Standard Deviation (SD) across all pooled samples}}{\text{Standard Deviation (SD) across all subjects samples}} = \frac{\text{Non - biological variance}}{\text{Biological variance}} \quad (3)$$

which shows the departure of non-biological variance from biological variance. Hence, analytes with smaller CoV and D-ratio were expected to have better and more reliable data quality. In our assay, analytes with CoV > 30% and D-Ratio > 50% were removed.

**Table S1.** SRM Table of analytes and Internal standard (ISTD)

| Name                                                                 | Precursor Ion (m/z) | Product Ion (m/z) | Ret. Time (s) | Collision Energy (V) | Cell Acc. Voltage (V) | Polarity | Remark                      |
|----------------------------------------------------------------------|---------------------|-------------------|---------------|----------------------|-----------------------|----------|-----------------------------|
| Analyte                                                              |                     |                   |               |                      |                       |          |                             |
| (S)-Malate/Glutaric acid                                             | 133.1               | 115.1             | 360           | 10                   | 5                     | Pos      |                             |
| 1-Methyladenosine                                                    | 281.8               | 150               | 196.5         | 27                   | 5                     | Pos      |                             |
| 1-Methylhistidine                                                    | 170.1               | 124.1             | 321.1         | 14                   | 5                     | Pos      |                             |
| 11-Deoxycortisol                                                     | 347.3               | 97.1              | 312           | 30                   | 5                     | Pos      |                             |
| 12-Deoxycortisol                                                     | 347.4               | 311.3             | 46            | 13                   | 5                     | Pos      | Removed after QC            |
| 17alpha-Hydroxyprogesterone                                          | 331.2               | 109.1             | 46            | 30                   | 5                     | Pos      |                             |
| 2-Amino-2-methylpropanoate                                           | 104.1               | 45.1              | 135.6         | 10                   | 5                     | Pos      |                             |
| 2-Aminobutyrate/Dimethylglycine                                      | 104.1               | 58.1              | 134.4         | 10                   | 5                     | Pos      |                             |
| 2-Aminoisbutyric acid                                                | 104.1               | 58.1              | 134.4         | 10                   | 5                     | Pos      |                             |
| 2-Aminooctanoic acid                                                 | 160                 | 55.3              | 159.8         | 21                   | 5                     | Pos      | Removed after QC            |
| 2-Aminopimelic acid/4-Aminopimelic acid                              | 174.1               | 130               | 207           | 12                   | 5                     | Neg      | Removed after manual review |
| 2-Hydrobenzoic acid/4- Hydrobenzoic acid                             | 137                 | 93.2              | 72.6          | 12                   | 5                     | Neg      |                             |
| 2-hydroxyisobutyric acid                                             | 105.1               | 77                | 168           | 10                   | 5                     | Pos      |                             |
| 2-Oxoglutarate/Phenylpropionic acid                                  | 145                 | 101               | 269.6         | 13                   | 5                     | Neg      |                             |
| 2,3-dihydroxybenzoic acid                                            | 153                 | 109               | 120           | 19                   | 5                     | Neg      |                             |
| 3-Amino-2-methylpropanoic acid (BAIBA)                               | 103.9               | 86                | 210           | 3                    | 5                     | Pos      |                             |
| 3-Aminoisobutanoate                                                  | 104.2               | 86.1              | 145.8         | 10                   | 5                     | Pos      |                             |
| 3-Carboxy-4-methyl-5-propyl-2-furanpropanoic acid (CMPF) (feature 1) | 239                 | 195               | 52.1          | 10                   | 5                     | Neg      |                             |
| 3-Carboxy-4-methyl-5-propyl-2-furanpropanoic acid (CMPF) (feature 2) | 239                 | 195               | 65            | 10                   | 5                     | Neg      | Removed after QC            |
| 3-Chlorotyrosine                                                     | 216.1               | 170               | 175.8         | 12                   | 5                     | Pos      |                             |
| 3-Hydroxybutyrate/Hydroxypyruvate                                    | 103                 | 59                | 72            | 5                    | 5                     | Neg      |                             |
| 3-Hydroxyisovalerylcarnitine                                         | 262.1               | 84.9              | 160.8         | 22                   | 5                     | Pos      |                             |

**Table S1.** Continued.

|                                                           |        |       |       |    |   |     |                             |
|-----------------------------------------------------------|--------|-------|-------|----|---|-----|-----------------------------|
| 3-Indolepropionate                                        | 189.9  | 129.9 | 48.6  | 20 | 5 | Pos | Removed after QC            |
| 3-Methoxytyramine                                         | 303.1  | 151.1 | 44.4  | 25 | 5 | Pos | Removed after QC            |
| 3-Methylhistamine                                         | 126.2  | 96.1  | 342   | 21 | 5 | Pos |                             |
| 3-Methylhistidine                                         | 170.1  | 126   | 348.6 | 12 | 5 | Pos |                             |
| 3-Nitrotyrosine (feature 1)                               | 227.1  | 168.1 | 150   | 16 | 5 | Pos |                             |
| 3-Nitrotyrosine (feature 2)                               | 227.1  | 181.8 | 156   | 16 | 5 | Pos |                             |
| 3-Nitrotyrosine (feature 3)                               | 227.1  | 180.8 | 216   | 12 | 5 | Neg |                             |
| 3-Phosphoserine                                           | 186    | 88    | 87    | 15 | 5 | Pos | Removed after QC            |
| 4-Aminobutyric Acid                                       | 104.01 | 69    | 198   | 22 | 5 | Pos | Removed after QC            |
| 4-Guanidinobutyric acid                                   | 146.1  | 86    | 20.6  | 25 | 5 | Pos |                             |
| 4-Hydroxy-L-Proline                                       | 130.1  | 87.9  | 207.2 | 10 | 5 | Neg |                             |
| 4-Pyridoxic acid//Epinephrine                             | 182.4  | 138.1 | 108   | 10 | 5 | Neg |                             |
| 5-Aminopentanoate                                         | 118.2  | 55.1  | 207.2 | 16 | 5 | Pos |                             |
| 5-Hydroxyindoleacetate                                    | 192.1  | 146   | 169.3 | 15 | 5 | Pos |                             |
| 5-Hydroxytryptophan/Serotonin                             | 177.1  | 160.1 | 274.8 | 20 | 5 | Pos |                             |
| 5-Methylcytosine hydrochloride                            | 126.2  | 109   | 354.9 | 20 | 5 | Pos |                             |
| 6-Aminouracil                                             | 127.9  | 67.8  | 201.6 | 20 | 5 | Pos |                             |
| 6'-Hydroxynicotinate                                      | 140.1  | 94    | 213   | 22 | 5 | Pos | Removed after manual review |
| 7-Methylguanosine                                         | 298    | 166   | 163.2 | 24 | 5 | Pos |                             |
| 7alpha-Hydroxy-4-cholesten-3-one (7-HCO)                  | 401.5  | 177   | 45    | 24 | 5 | Pos | Removed after manual review |
| 7alpha,12alpha-Dihydroxycholest-4-en-3-one<br>(7,12-DHCO) | 417.1  | 381.2 | 47.3  | 20 | 5 | Pos |                             |
| 8-Hydroxydeoxyguanosine                                   | 284.3  | 168.1 | 4     | 10 | 5 | Pos | Removed after QC            |
| 8-Isoprostane                                             | 353.4  | 193.2 | 54    | 30 | 5 | Neg |                             |
| Absciscic acid                                            | 265.1  | 247.1 | 212.9 | 10 | 5 | Pos |                             |
| Acadesine                                                 | 259    | 110   | 153   | 24 | 5 | Pos | Removed after QC            |

**Table S1.** Continued.

|                                |       |       |       |    |   |     |                             |
|--------------------------------|-------|-------|-------|----|---|-----|-----------------------------|
| Acetaminophen                  | 152   | 110   | 228.6 | 20 | 5 | Pos |                             |
| Acetylcarnitine (C2)           | 260   | 85.1  | 76.7  | 26 | 5 | Pos | Removed after manual review |
| Acetylcholine                  | 146.1 | 87    | 189.7 | 14 | 5 | Pos |                             |
| Acetylglycine/Guanidineacetate | 118   | 76    | 263.6 | 10 | 5 | Pos |                             |
| Acetylphosphate                | 139   | 79    | 168   | 24 | 5 | Neg |                             |
| Acetylputrescine (feature 1)   | 131.1 | 114.1 | 168   | 10 | 5 | Pos | detected RT:150             |
| Acetylputrescine (feature 2)   | 131.1 | 114.1 | 168   | 10 | 5 | Pos | detected RT:197             |
| Aconitate                      | 173   | 85    | 228   | 10 | 5 | Neg |                             |
| Adenine                        | 136   | 92    | 209.3 | 30 | 5 | Pos |                             |
| Adenosine                      | 268   | 136   | 166.2 | 19 | 5 | Pos | Removed after QC            |
| Adipoylcarnitine (C6DC)        | 290   | 85.1  | 47    | 35 | 5 | Pos |                             |
| ADMA                           | 203.2 | 46.2  | 294.9 | 17 | 5 | Pos |                             |
| Agmatine                       | 131   | 72    | 210   | 15 | 5 | Pos |                             |
| Alanine                        | 90.1  | 44    | 257.5 | 6  | 5 | Pos |                             |
| Allantoic acid                 | 177   | 61    | 360   | 10 | 5 | Pos |                             |
| Allantoin (feature1)           | 157   | 96.9  | 164.6 | 10 | 3 | Neg |                             |
| Allantoin (feature2)           | 157   | 114   | 166   | 8  | 3 | Neg |                             |
| Allantoin (feature3)           | 159.1 | 116   | 137.6 | 5  | 5 | Pos | Removed after QC            |
| Alpha-Aminoadipate             | 162.2 | 127   | 213   | 20 | 5 | Pos |                             |
| Alpha-Tocopherol (Vitamin E)   | 431.4 | 165   | 37    | 17 | 5 | Pos |                             |
| Aminoisobutyrate               | 104.1 | 86    | 149.4 | 16 | 5 | Pos |                             |
| Androstenedione                | 287.1 | 97.1  | 60    | 22 | 5 | Pos |                             |
| Arachidic carnitine (C20:0)    | 456.7 | 85    | 53.4  | 25 | 5 | Pos |                             |
| Arginine                       | 175   | 70    | 363.6 | 25 | 5 | Pos |                             |
| Argininosuccinate              | 289.1 | 271.1 | 209.8 | 10 | 5 | Neg |                             |
| Asparagine                     | 133   | 74    | 267.6 | 13 | 5 | Pos |                             |
| Behenic carnitine (C22:0)      | 484.7 | 85    | 40    | 25 | 5 | Pos |                             |
| Betaine                        | 118   | 58    | 190   | 25 | 5 | Pos |                             |

**Table S1.** Continued.

|                              |       |       |       |    |   |     |                                               |
|------------------------------|-------|-------|-------|----|---|-----|-----------------------------------------------|
| Betaine aldehyde             | 102   | 58    | 218.4 | 21 | 5 | Pos | Removed after QC                              |
| Bilirubin                    | 583.3 | 285   | 40.8  | 36 | 5 | Neg |                                               |
| Biotin                       | 243   | 42    | 171   | 55 | 5 | Neg | Removed after QC                              |
| Butyrylcarnitine             | 232.1 | 84.9  | 105   | 20 | 5 | Pos |                                               |
| Caffeine                     | 195.2 | 138.1 | 49.8  | 20 | 5 | Pos |                                               |
| CDP-ethanolamine             | 445   | 273   | 41.4  | 29 | 5 | Neg | Removed after QC                              |
| Cervonyl carnitine (C22:6)   | 472.7 | 85    | 114   | 25 | 5 | Pos |                                               |
| Cholesteryl sulfate          | 465.2 | 97    | 54.4  | 39 | 5 | Neg | Removed after QC                              |
| Cholic acid (CA)             | 407.2 | 345.2 | 42.9  | 32 | 5 | Neg |                                               |
| Choline                      | 104   | 60    | 150   | 17 | 5 | Pos |                                               |
| Cis-5-tetradecenoylcarnitine | 370.3 | 85    | 66    | 15 | 5 | Pos |                                               |
| Citramalate                  | 149.1 | 93.1  | 36.7  | 18 | 5 | Pos |                                               |
| Citrulline                   | 176.1 | 70.1  | 370.8 | 15 | 5 | Pos |                                               |
| Corticosterone               | 347.2 | 121.2 | 47.4  | 22 | 5 | Pos | Removed after QC                              |
| Cortisone                    | 361.2 | 163   | 48    | 22 | 5 | Pos | Removed after manual review                   |
| Creatine (feature 1)         | 132.1 | 44.3  | 176.4 | 21 | 5 | Pos | detected RT: 174                              |
| Creatine (feature 2)         | 132.1 | 44.3  | 176.4 | 21 | 5 | Pos | detected RT: 183; Removed after manual review |
| Creatinine                   | 114   | 44.3  | 151   | 19 | 5 | Pos | Removed after manual review                   |
| Cyanocobalamin               | 678.3 | 147   | 97.8  | 32 | 5 | Pos | Removed after QC                              |
| Cys-Gly, oxidized            | 355.1 | 176.8 | 37.2  | 20 | 5 | Pos | Removed after QC                              |
| Cystathionine                | 221.1 | 120.1 | 132   | 12 | 5 | Pos |                                               |
| Cysteine                     | 122.1 | 76.1  | 295.8 | 13 | 5 | Pos |                                               |
| Cysteine-sulfinic acid       | 154.1 | 136   | 251.8 | 5  | 5 | Pos |                                               |
| Cystine                      | 241.2 | 151.9 | 338.5 | 9  | 7 | Pos |                                               |
| Cytosine (feature 1)         | 112   | 95    | 138   | 20 | 5 | Pos |                                               |
| Cytosine (feature 2)         | 112   | 95    | 155   | 20 | 5 | Pos | Removed after QC                              |
| D-Erythrose-4-phosphate      | 199   | 97    | 193.3 | 19 | 5 | Neg | Removed after manual review                   |

**Table S1.** Continued.

|                                                      |       |       |       |    |   |     |                             |
|------------------------------------------------------|-------|-------|-------|----|---|-----|-----------------------------|
| D-Glucosamine/S-carboxymethyl-L-cysteine             | 180.1 | 163   | 158.4 | 10 | 5 | Pos | Removed after QC            |
| D-Glyceraldehyde 3-phosphate                         | 169.1 | 97    | 210.6 | 14 | 5 | Neg |                             |
| D-Glyceric acid                                      | 107   | 79    | 166.8 | 10 | 5 | Pos |                             |
| D-Pantothenic acid                                   | 220.2 | 90.1  | 92.4  | 10 | 5 | Pos |                             |
| Decenoylcarnitine                                    | 314.5 | 85    | 60    | 24 | 5 | Pos |                             |
| Deoxyadenosine                                       | 252   | 136   | 150.6 | 22 | 5 | Pos |                             |
| Deoxycarnitine                                       | 146.2 | 87    | 183   | 16 | 5 | Pos | Removed after manual review |
| Deoxycholic acid (DCA)                               | 391.2 | 345.2 | 48.6  | 36 | 5 | Neg | Removed after QC            |
| Dihydroorotate                                       | 157   | 113   | 210   | 14 | 5 | Neg |                             |
| Dihydroxyacetone phosphate                           | 183.2 | 165.1 | 39    | 10 | 5 | Pos |                             |
| Dimethylarginine                                     | 203.2 | 70.1  | 293.4 | 20 | 5 | Pos |                             |
| Dityrosine                                           | 361.3 | 315.1 | 49.8  | 25 | 5 | Pos |                             |
| Dodecenoylcarnitine (C12:1)                          | 342.5 | 85    | 58.8  | 25 | 5 | Pos | Removed after manual review |
| Dopamine                                             | 154.2 | 91.2  | 94.8  | 22 | 5 | Pos | Removed after QC            |
| dUMP                                                 | 307   | 195   | 52    | 18 | 5 | Neg | Removed after QC            |
| Epinephrine                                          | 184.1 | 166   | 69    | 11 | 5 | Pos |                             |
| Ergothioneine                                        | 230   | 127   | 246   | 20 | 5 | Pos |                             |
| Ethyl-3-ureidopropionate                             | 161.1 | 120   | 165.3 | 10 | 5 | Pos |                             |
| Flavone                                              | 223   | 121   | 52.2  | 29 | 5 | Pos |                             |
| Free carnitine (C0)                                  | 162   | 103   | 217.8 | 22 | 5 | Pos |                             |
| Fumarate/Maleic acid                                 | 115   | 71    | 360   | 13 | 5 | Neg | Removed after QC            |
| Galactitol                                           | 183.1 | 165.1 | 204   | 10 | 5 | Pos | Removed after QC            |
| Gluconolactone                                       | 177   | 99    | 225   | 10 | 5 | Neg |                             |
| Glutaconic acid                                      | 129   | 85    | 163.6 | 11 | 5 | Neg |                             |
| Glutamic acid                                        | 148.1 | 84.1  | 282   | 17 | 5 | Pos |                             |
| Glutamine                                            | 147.1 | 84.1  | 360   | 17 | 5 | Pos |                             |
| Glutaryl carnitine (C5DC)/Glutaryl carnitine (C6-OH) | 276   | 85.1  | 201.8 | 40 | 5 | Pos |                             |

**Table S1.** Continued.

|                                                                                                         |       |       |       |    |   |     |                             |
|---------------------------------------------------------------------------------------------------------|-------|-------|-------|----|---|-----|-----------------------------|
| Glutathione-oxidized (GSSG)                                                                             | 613.2 | 355.2 | 37    | 22 | 5 | Pos | Removed after QC            |
| Glutathione-reduced (GSH)                                                                               | 308.1 | 84    | 43.2  | 18 | 5 | Pos |                             |
| Glycerophosphocholine                                                                                   | 258.1 | 104   | 270   | 16 | 5 | Pos |                             |
| Glycine                                                                                                 | 76.4  | 58.1  | 192   | 10 | 5 | Pos |                             |
| Glycochenodeoxycholic acid<br>(GCDCA)/Glycodeoxycholic acid<br>(GDCA)/Glycoursodeoxycholic acid (GUDCA) | 448.3 | 74    | 85.6  | 10 | 5 | Neg | Removed after manual review |
| Glycocholic acid (GCA)                                                                                  | 464.4 | 74.2  | 111   | 30 | 5 | Neg |                             |
| Glycolaldehyde dimer                                                                                    | 121.1 | 77.1  | 166.8 | 21 | 5 | Pos |                             |
| Glycolate/Propylene glycol (feature 1)                                                                  | 77.1  | 59    | 208.1 | 10 | 5 | Pos |                             |
| Glycolate/Propylene glycol (feature 2)                                                                  | 77.2  | 59.1  | 207.4 | 10 | 5 | Pos |                             |
| Glyoxylate                                                                                              | 73    | 45    | 198   | 8  | 5 | Pos |                             |
| Guanosine                                                                                               | 284.1 | 151.9 | 197.9 | 23 | 5 | Pos |                             |
| Heptanoyl-L-carnitine (C7:0)                                                                            | 274.3 | 85    | 76    | 20 | 5 | Pos |                             |
| Hercynine                                                                                               | 198   | 154.1 | 292.8 | 9  | 4 | Pos |                             |
| Hexadecenoyl carnitine (C16:1)                                                                          | 398.3 | 85    | 66    | 15 | 5 | Pos |                             |
| Hexenoylcarnitine (C6:1)/Hexenoylcarnitine (C6)                                                         | 258   | 85.1  | 96    | 35 | 5 | Pos |                             |
| Hippurate                                                                                               | 178   | 77    | 120   | 20 | 5 | Neg |                             |
| Histamine                                                                                               | 112.1 | 95    | 360   | 15 | 5 | Pos |                             |
| Histidine                                                                                               | 156.1 | 110.1 | 367.2 | 14 | 5 | Pos |                             |
| Homoarginine (hArg) (feature 1)                                                                         | 189.2 | 144   | 321.6 | 15 | 5 | Pos |                             |
| Homoarginine (hArg) (feature 2)                                                                         | 189.2 | 144   | 351   | 15 | 5 | Pos |                             |
| Homocysteine (feature 1)                                                                                | 136.1 | 91    | 108   | 19 | 5 | Pos | Removed after QC            |
| Homocysteine (feature 2)                                                                                | 136.1 | 91    | 162   | 19 | 5 | Pos |                             |
| Homocysteine (feature 3)                                                                                | 136.1 | 90.2  | 204   | 19 | 5 | Pos |                             |
| Hydroxybutyryl-carnitine (C4-OH)                                                                        | 248   | 85.1  | 177.3 | 30 | 5 | Pos | Removed after manual review |
| Hydroxydodecenoylcarnitine                                                                              | 358.5 | 85    | 60.3  | 25 | 5 | Pos |                             |
| Hydroxyhexadeceneoylcarnitine                                                                           | 414.3 | 85    | 29.1  | 25 | 5 | Pos |                             |



**Table S1.** Continued.

|                                 |       |       |       |    |   |     |                             |
|---------------------------------|-------|-------|-------|----|---|-----|-----------------------------|
| Hydroxyproline                  | 132   | 68.2  | 252   | 19 | 5 | Pos | Removed after QC            |
| Hypotaurine                     | 110.1 | 82.1  | 360   | 12 | 5 | Pos |                             |
| Hypoxanthine                    | 134.9 | 91.9  | 125.4 | 18 | 5 | Neg |                             |
| Imidazole                       | 69    | 41.4  | 184.8 | 10 | 5 | Pos |                             |
| Indole                          | 118   | 91    | 177.3 | 26 | 5 | Pos |                             |
| Isovaleryl-carnitine (3-M-C4:0) | 246.1 | 85    | 92.9  | 15 | 5 | Pos |                             |
| Kynurenate                      | 190.1 | 144.1 | 345   | 15 | 5 | Pos |                             |
| Kynurenine                      | 209.2 | 192   | 167.8 | 10 | 5 | Pos |                             |
| L-Aspartic Acid                 | 134   | 74    | 212.1 | 12 | 5 | Pos |                             |
| L-DOPA                          | 198.1 | 152.1 | 48    | 8  | 5 | Pos | Removed after QC            |
| L-homocysteine thiolactone      | 118.2 | 100   | 128.9 | 14 | 5 | Pos | Removed after QC            |
| L-Ornithine                     | 133.1 | 70.1  | 374.2 | 16 | 5 | Pos |                             |
| Lactate                         | 89    | 43.2  | 100.9 | 16 | 5 | Neg |                             |
| Lauroylcarnitine                | 344.2 | 285   | 72.7  | 16 | 5 | Pos | Removed after manual review |
| Leucine/Isoleucine (feature 1)  | 132.1 | 86    | 183   | 13 | 5 | Pos | detected RT: 174            |
| Leucine/Isoleucine (feature 2)  | 132.1 | 86    | 183   | 13 | 5 | Pos | detected RT: 183            |
| Linoleate (feature 1)           | 279.2 | 279.2 | 41.4  | 2  | 5 | Neg |                             |
| Linoleate (feature 2)           | 279.2 | 279.2 | 69    | 2  | 5 | Neg |                             |
| Lithocholic acid (LCA)          | 498.3 | 80    | 127.4 | 70 | 5 | Neg |                             |
| LPC 20:0                        | 552.4 | 184   | 103.6 | 25 | 5 | Pos | Removed after QC            |
| LPC 20:1                        | 550.4 | 184   | 104.8 | 25 | 5 | Pos |                             |
| LPC 20:3                        | 546.4 | 184   | 106.1 | 25 | 5 | Pos | Removed after manual review |
| LPC 20:4                        | 544.3 | 184   | 106.1 | 25 | 5 | Pos | Removed after QC            |
| LPC 20:5                        | 542.3 | 184   | 109.8 | 25 | 5 | Pos |                             |
| LPC 22:2                        | 576.4 | 184   | 102   | 25 | 5 | Pos | Removed after QC            |
| LPC 22:6                        | 568.3 | 184   | 104.8 | 25 | 5 | Pos | Removed after manual review |
| LPC 24:0                        | 608.5 | 184   | 98.5  | 25 | 5 | Pos | Removed after QC            |
| LPC 26:0                        | 636.5 | 184   | 90    | 25 | 5 | Pos | Removed after QC            |

**Table S1.** Continued.

|                                  |       |       |       |    |   |     |                  |
|----------------------------------|-------|-------|-------|----|---|-----|------------------|
| LPC 28:1                         | 662.5 | 184   | 72    | 25 | 5 | Pos | Removed after QC |
| Lysine                           | 147   | 84    | 361.8 | 14 | 5 | Pos |                  |
| Maleic acid                      | 115   | 71    | 120   | 13 | 5 | Neg |                  |
| Malonylcarnitine (C3-DC)         | 248.1 | 84.8  | 177.6 | 18 | 5 | Pos |                  |
| Mannitol/Sorbitol                | 181.1 | 59    | 225   | 8  | 5 | Neg |                  |
| Melatonin                        | 233.2 | 174.1 | 105.2 | 12 | 5 | Pos |                  |
| Mesoxalate                       | 119.1 | 91.1  | 43.8  | 16 | 5 | Pos |                  |
| Metanephrene                     | 179.9 | 148.2 | 45.6  | 20 | 3 | Pos |                  |
| Metanephrene/Selenomethionine    | 198.2 | 180.9 | 280   | 12 | 5 | Pos |                  |
| Methionine                       | 150.1 | 133   | 195.9 | 12 | 5 | Pos |                  |
| Methionine sulfoxide (feature 1) | 166.1 | 74    | 167   | 10 | 5 | Pos | Removed after QC |
| Methionine sulfoxide (feature 2) | 166.1 | 103   | 166.2 | 15 | 5 | Pos |                  |
| Methylcrotonylcarnitine (C5:1)   | 244.1 | 85    | 105   | 18 | 5 | Pos |                  |
| Methylcrotonylcarnitine (C5:1)   | 244   | 85.1  | 101.2 | 30 | 5 | Pos |                  |
| Methylcysteine (feature 1)       | 136   | 119   | 207   | 12 | 5 | Pos |                  |
| Methylcysteine (feature 2)       | 136   | 119   | 223   | 12 | 5 | Pos |                  |
| Methylguanidine                  | 74.2  | 42.2  | 181.9 | 10 | 5 | Pos |                  |
| Methylhistidine (feature 1)      | 170.1 | 96    | 347.2 | 22 | 5 | Pos |                  |
| Methylhistidine (feature 2)      | 170.1 | 96    | 320   | 22 | 5 | Pos |                  |
| Methylmalonic acid               | 117   | 73.1  | 116.9 | 13 | 5 | Neg |                  |
| Methylnicotinamide               | 137   | 94    | 165   | 20 | 5 | Pos |                  |
| Monosaccharide                   | 198   | 163   | 237   | 6  | 5 | Pos |                  |
| Myo-inositol                     | 179   | 59.8  | 226.6 | 10 | 5 | Neg |                  |
| N-Acetyl-D-glucosamine           | 222   | 138   | 202.6 | 18 | 5 | Pos | Removed after QC |
| N-Acetyl-DL-methionine           | 190.2 | 147.9 | 178.2 | 12 | 5 | Pos |                  |
| N-Acetyl-L-alanine               | 130   | 88.2  | 117.6 | 12 | 5 | Pos |                  |
| N-Acetyl-L-asparagine            | 173.1 | 154.9 | 209.9 | 8  | 5 | Neg |                  |
| N-Acetyl-L-aspartic acid         | 174   | 88    | 207.1 | 12 | 5 | Neg |                  |

**Table S1.** Continued.

|                                         |       |       |       |    |   |     |                             |
|-----------------------------------------|-------|-------|-------|----|---|-----|-----------------------------|
| N-Acetyl-L-Cysteine                     | 163.1 | 43.2  | 213.2 | 17 | 5 | Pos |                             |
| N-Acetylasparagine                      | 175.2 | 133   | 367.2 | 11 | 5 | Pos |                             |
| N-Acetylaspartate/N-Amidino-L-aspartate | 176.1 | 134   | 251.3 | 10 | 5 | Pos |                             |
| N-Acetylglucosamine phosphate           | 300   | 79    | 169.8 | 34 | 5 | Neg | Removed after QC            |
| N-Acetylglutamic acid                   | 190.2 | 130.1 | 327   | 12 | 5 | Pos |                             |
| N-Acetylglutamine (feature 1)           | 189.1 | 130   | 339.6 | 17 | 5 | Pos | detected RT: 326            |
| N-Acetylglutamine (feature 2)           | 189.1 | 130   | 339.6 | 17 | 5 | Pos | detected RT: 351            |
| N-Acetylglycine                         | 118.2 | 72.1  | 204.6 | 16 | 5 | Pos |                             |
| N-acetylmethionine                      | 175.1 | 115.1 | 363   | 10 | 5 | Pos |                             |
| N-Acetylserine                          | 146   | 116   | 204   | 4  | 5 | Neg | Removed after QC            |
| N-Alpha-Acetyl-L-lysine                 | 187.1 | 144.9 | 234   | 8  | 5 | Neg | Removed after QC            |
| N-carbamoyl-L-aspartate                 | 175   | 132   | 277.8 | 13 | 5 | Neg |                             |
| N-monomethylarginine (NMMA)             | 189.2 | 74    | 326.2 | 15 | 5 | Pos |                             |
| N6-acetyl-L-lysine                      | 189.1 | 126.1 | 343.8 | 10 | 5 | Pos |                             |
| N6, N6, N6-Trimethyllysine (feature 1)  | 189.2 | 130.1 | 321   | 14 | 5 | Pos |                             |
| N6, N6, N6-Trimethyllysine (feature 2)  | 189.2 | 130.1 | 343.8 | 14 | 5 | Pos |                             |
| NAADP                                   | 745.1 | 604   | 70.7  | 20 | 5 | Pos | Removed after QC            |
| NADH                                    | 666.1 | 514   | 111   | 28 | 5 | Pos | Removed after QC            |
| NG,NG-Dimethylarginine                  | 203   | 70    | 293.6 | 24 | 5 | Pos |                             |
| Nicotinamide                            | 123   | 79.9  | 210.8 | 18 | 5 | Pos |                             |
| Nicotinamide riboside                   | 255.1 | 56.9  | 94.1  | 24 | 5 | Pos |                             |
| Nicotinamide ribotide                   | 335   | 123   | 48    | 30 | 5 | Pos | Removed after QC            |
| Nicotinic acid                          | 124   | 80.1  | 321.4 | 18 | 5 | Pos |                             |
| Nitroarginine                           | 220.1 | 59.1  | 180   | 35 | 5 | Pos |                             |
| NMN (-H <sub>2</sub> O)                 | 301.1 | 134.1 | 39.4  | 35 | 5 | Pos | Removed after QC            |
| Noradrenaline                           | 170.2 | 93    | 321   | 26 | 5 | Pos |                             |
| Norleucine                              | 132.2 | 69.1  | 183.1 | 16 | 5 | Pos | Removed after manual review |
| Norvaline                               | 118.2 | 72.1  | 208   | 16 | 5 | Pos |                             |

**Table S1.** Continued.

|                                |       |       |       |    |   |     |                             |
|--------------------------------|-------|-------|-------|----|---|-----|-----------------------------|
| O-Acetyl-L-serine              | 148.1 | 106   | 186   | 10 | 5 | Pos | Removed after QC            |
| O-succinyl-L-homoserine        | 220.1 | 102.1 | 210   | 11 | 5 | Pos | Removed after QC            |
| Octadecenoyl carnitine (C18:1) | 426.3 | 85    | 67    | 15 | 5 | Pos |                             |
| Octadecadienoylcarnitine       | 424.3 | 85    | 58.9  | 32 | 5 | Pos |                             |
| Octenoylcarnitine (C8:1)       | 286.1 | 85    | 73.6  | 24 | 5 | Pos |                             |
| Orotate                        | 155   | 111   | 186   | 10 | 5 | Neg | Removed after QC            |
| Orotidine-5-phosphate          | 367   | 323   | 46.9  | 18 | 5 | Neg |                             |
| Orotidylic acid                | 367   | 97    | 65.1  | 10 | 5 | Neg | Removed after QC            |
| Oxalate                        | 89    | 45    | 102   | 8  | 5 | Neg |                             |
| Oxaloacetate                   | 131   | 87    | 104.4 | 8  | 5 | Neg |                             |
| Oxoguanine/3-Methoxytyramine   | 168   | 151   | 120   | 20 | 5 | Pos |                             |
| Oxypurinol                     | 153   | 136   | 67.2  | 20 | 5 | Pos |                             |
| Palmitoylcarnitine             | 400.3 | 85    | 56.3  | 15 | 5 | Pos |                             |
| Pantothenic acid (Vitamin B5)  | 218   | 146   | 90    | 21 | 5 | Neg | Removed after QC            |
| Paraxanthine                   | 181.2 | 124.1 | 58    | 21 | 5 | Pos | Removed after QC            |
| Phenylacetylglycine            | 194.1 | 76    | 197.1 | 10 | 5 | Pos |                             |
| Phenylalanine                  | 166   | 120   | 168   | 10 | 5 | Pos |                             |
| Phenylpyruvate                 | 163   | 91    | 105.6 | 13 | 5 | Neg | Removed after QC            |
| Phospho(enol) pyruvic acid     | 167   | 79    | 120   | 10 | 5 | Pos | Removed after QC            |
| Phosphocreatine                | 212   | 43.9  | 201   | 24 | 5 | Pos |                             |
| Phosphoglycerates              | 185   | 97    | 156   | 10 | 5 | Neg | Removed after QC            |
| Phosphorylcholine              | 183   | 125   | 87    | 23 | 5 | Pos |                             |
| Pipecolic acid (feature 1)     | 138   | 84    | 174.6 | 18 | 5 | Pos |                             |
| Pipecolic acid (feature 2)     | 138   | 84    | 202.8 | 18 | 5 | Pos |                             |
| Progesterone                   | 313.2 | 276.8 | 211.1 | 25 | 5 | Neg |                             |
| Proline                        | 116.1 | 70.1  | 214.1 | 13 | 5 | Pos |                             |
| Propionylcarnitine (C3)        | 218.1 | 85    | 132.3 | 15 | 5 | Pos | Removed after manual review |
| Purine                         | 121.1 | 94    | 166.8 | 21 | 5 | Pos |                             |

**Table S1.** Continued.

|                                                                                                               |       |       |       |    |   |     |                                               |
|---------------------------------------------------------------------------------------------------------------|-------|-------|-------|----|---|-----|-----------------------------------------------|
| Putrescine                                                                                                    | 89    | 72    | 296.1 | 12 | 5 | Pos | Removed after manual review                   |
| Pyrazole                                                                                                      | 68    | 41.2  | 212.4 | 19 | 5 | Pos |                                               |
| Pyridoxamine (Vitamin B6)                                                                                     | 169   | 152   | 200   | 11 | 5 | Pos |                                               |
| Pyridoxine (Vitamin B6)                                                                                       | 170   | 134   | 39    | 18 | 5 | Pos |                                               |
| Pyrrolidinone                                                                                                 | 86.1  | 69.1  | 183.4 | 10 | 5 | Pos |                                               |
| Ribose                                                                                                        | 149   | 59.1  | 222   | 8  | 5 | Neg | Removed after manual review                   |
| S-methyl ergothioneine                                                                                        | 244.1 | 141   | 210   | 20 | 5 | Pos |                                               |
| S-methyl-5-thioadenosine                                                                                      | 298   | 136   | 156.6 | 29 | 5 | Pos | Removed after QC                              |
| S-Nitrosoglutathione                                                                                          | 337.1 | 307.1 | 57.6  | 5  | 5 | Pos |                                               |
| Sarcosine                                                                                                     | 90    | 44.1  | 251.8 | 20 | 5 | Pos |                                               |
| Sedoheptulose 1,7-bisphosphate                                                                                | 369   | 166   | 73.4  | 20 | 5 | Neg | Removed after QC                              |
| Serine                                                                                                        | 106   | 60    | 149.7 | 15 | 5 | Pos |                                               |
| Shikimate                                                                                                     | 173   | 93.1  | 69.2  | 18 | 5 | Neg |                                               |
| Spermidine                                                                                                    | 146.2 | 72    | 201.6 | 22 | 5 | Pos |                                               |
| Spermine                                                                                                      | 202.1 | 129.1 | 114   | 19 | 5 | Pos |                                               |
| Stearoyl-L-carnitine                                                                                          | 428.4 | 85    | 53.4  | 15 | 5 | Pos |                                               |
| Succinate                                                                                                     | 116.9 | 73    | 104.4 | 10 | 5 | Neg |                                               |
| Succinylcarnitine (C4-DC)/3-hydroxyisovaleryl carnitine (C5-OH)                                               | 262   | 85.1  | 160.9 | 22 | 5 | Pos |                                               |
| Symmetrical dimethylarginine (SDMA)                                                                           | 203.2 | 171.9 | 293.4 | 9  | 5 | Pos |                                               |
| Taurine                                                                                                       | 124   | 80    | 245.8 | 18 | 5 | Neg | Removed after QC                              |
| Taurochenodeoxycholic Acid (TCDCA)/Taurodeoxycholic Acid (TDCA)/Tauroursodeoxycholic acid (TUDCA) (feature 1) | 498.3 | 498.3 | 124.2 | 20 | 5 | Neg | detected RT: 40                               |
| Taurochenodeoxycholic Acid (TCDCA)/Taurodeoxycholic Acid (TDCA)/Tauroursodeoxycholic acid (TUDCA) (feature 2) | 498.3 | 498.3 | 124.2 | 20 | 5 | Neg | detected RT: 118; Removed after manual review |

**Table S1.** Continued.

|                                                                                                                        |       |       |       |    |   |     |                  |
|------------------------------------------------------------------------------------------------------------------------|-------|-------|-------|----|---|-----|------------------|
| Taurochenodeoxycholic Acid<br>(TCDCA)/Taurodeoxycholic Acid<br>(TDCA)/Tauroursodeoxycholic acid (TUDCA)<br>(feature 3) | 498.3 | 498.3 | 126   | 20 | 5 | Neg |                  |
| Taurocholate (TCA)                                                                                                     | 514.3 | 514.3 | 42.8  | 20 | 5 | Neg |                  |
| Taurolithocholic acid (TLCA)                                                                                           | 498.3 | 80    | 122.9 | 70 | 5 | Neg |                  |
| Testosterone                                                                                                           | 289.1 | 109   | 42.6  | 22 | 5 | Pos | Removed after QC |
| Tetrahydrofolate                                                                                                       | 446.1 | 430.1 | 37.8  | 11 | 5 | Pos | Removed after QC |
| Theobromine                                                                                                            | 181.2 | 138   | 56.4  | 17 | 5 | Pos |                  |
| Theophylline                                                                                                           | 181.1 | 124.1 | 57.6  | 19 | 5 | Pos | Removed after QC |
| Thiamine (Vitamin B1)                                                                                                  | 265   | 122   | 170.5 | 19 | 5 | Pos |                  |
| Thiourea                                                                                                               | 77    | 60    | 196.4 | 10 | 5 | Pos |                  |
| Thymine                                                                                                                | 127.1 | 110   | 350.3 | 19 | 5 | Pos |                  |
| Trans-4-hydroxyproline (feature 1)                                                                                     | 132   | 85.9  | 175.1 | 14 | 5 | Pos |                  |
| Trans-4-hydroxyproline (feature 2)                                                                                     | 132   | 85.9  | 183.5 | 14 | 5 | Pos | Removed after QC |
| Trigonelline                                                                                                           | 138.1 | 92.1  | 195   | 19 | 5 | Pos |                  |
| Trimethylamine (TMA)                                                                                                   | 144.1 | 55.1  | 180   | 30 | 6 | Pos |                  |
| Trimethylamine oxide (TMAO)                                                                                            | 76    | 58    | 197.4 | 25 | 5 | Pos |                  |
| Triuret (feature 1)                                                                                                    | 146.9 | 86.9  | 162   | 6  | 5 | Pos |                  |
| Triuret (feature 2)                                                                                                    | 146.9 | 86.9  | 198   | 6  | 5 | Pos | Removed after QC |
| Tryptophan                                                                                                             | 205.1 | 188.1 | 177.5 | 10 | 5 | Pos |                  |
| Tyrosine                                                                                                               | 182   | 136   | 223.2 | 8  | 5 | Pos |                  |
| Uracil                                                                                                                 | 113   | 70    | 125   | 20 | 5 | Pos |                  |
| Urea                                                                                                                   | 61.1  | 44.2  | 105.2 | 25 | 5 | Pos |                  |
| Urea/Ethanolamine                                                                                                      | 62.1  | 44.2  | 180   | 12 | 5 | Pos |                  |
| Uric acid                                                                                                              | 167   | 123.9 | 204.5 | 13 | 3 | Neg |                  |
| Uridine                                                                                                                | 245.1 | 113   | 127.2 | 8  | 5 | Pos |                  |
| Valine                                                                                                                 | 118   | 72    | 207.2 | 8  | 5 | Pos |                  |

**Table S1.** Continued.

|                         |       |       |       |    |   |     |                                   |
|-------------------------|-------|-------|-------|----|---|-----|-----------------------------------|
| Vitamin D2 (feature 1)  | 397.3 | 397.3 | 42.5  | 5  | 5 | Pos | detected RT: 39                   |
| Vitamin D2 (feature 2)  | 397.3 | 397.3 | 42.5  | 5  | 5 | Pos | detected RT: 45; Removed after QC |
| Vitamin D3              | 383.3 | 339.1 | 48    | 13 | 5 | Neg | Removed after manual review       |
| Vitamin K1              | 451.4 | 187   | 110.8 | 25 | 5 | Pos | Removed after QC                  |
| Xanthine                | 151   | 108   | 123   | 16 | 5 | Neg |                                   |
| Xanthosine              | 285   | 153   | 165   | 10 | 5 | Pos |                                   |
| Xanthurenic acid        | 204   | 160   | 216   | 19 | 5 | Neg | Removed after QC                  |
| <b>ISTD</b>             |       |       |       |    |   |     |                                   |
| 7-HCO ISTD              | 408.1 | 97.2  | 42    | 32 | 5 | Pos |                                   |
| 7,12-DHCO ISTD          | 425.2 | 398.3 | 42    | 15 | 5 | Pos |                                   |
| 8- F2 isop ISTD         | 357.4 | 197.1 | 48    | 30 | 5 | Neg |                                   |
| ADMA ISTD               | 210.4 | 77.1  | 299.5 | 21 | 5 | Pos |                                   |
| Allantoin ISTD          | 162.9 | 117.8 | 166   | 20 | 5 | Neg |                                   |
| Arginine ISTD           | 185.1 | 122.1 | 366   | 25 | 5 | Pos |                                   |
| Aspartic acid ISTD      | 139.1 | 92.1  | 179.8 | 12 | 5 | Pos |                                   |
| BAIBA ISTD              | 107.2 | 89    | 234   | 5  | 5 | Pos |                                   |
| butyryl carnithine ISTD | 235.1 | 84.9  | 108   | 20 | 5 | Pos |                                   |
| CDCADCA-UDCA-D4         | 395.3 | 395.3 | 48    | 30 | 5 | Neg |                                   |
| Creatinine ISTD         | 117.1 | 47.1  | 149.7 | 19 | 5 | Pos |                                   |
| Ergo ISTD               | 239.3 | 127   | 234   | 20 | 5 | Pos |                                   |
| GCA-D4 ISTD             | 468.3 | 74    | 96    | 70 | 5 | Neg |                                   |
| GCDCA-D4 ISTD           | 452.3 | 74    | 58.8  | 72 | 5 | Neg |                                   |
| glutamic acid ISTD      | 154.1 | 89.1  | 277.8 | 10 | 7 | Pos |                                   |
| glutamine ISTD          | 152.1 | 88.1  | 258   | 15 | 5 | Pos |                                   |
| Hercynine ISTD          | 207.2 | 163.2 | 288   | 9  | 4 | Pos |                                   |
| Histidine ISTD          | 165.2 | 118.2 | 354   | 15 | 5 | Pos |                                   |
| Homocysteine ISTD       | 140.2 | 94.2  | 362.4 | 15 | 5 | Pos |                                   |

**Table S1.** Continued.

|                          |       |       |       |    |   |     |
|--------------------------|-------|-------|-------|----|---|-----|
| Isoleucine ISTD          | 139   | 74.1  | 180   | 20 | 5 | Pos |
| Isovalerylcarnitine ISTD | 255.2 | 85.1  | 91.8  | 20 | 5 | Pos |
| LCA D4                   | 379.3 | 379.3 | 45.6  | 30 | 5 | Neg |
| leucine ISTD             | 138.1 | 91.2  | 195.6 | 10 | 5 | Pos |
| Lysine ISTD              | 155.2 | 90.1  | 36.72 | 18 | 7 | Pos |
| Methionine ISTD          | 156.2 | 109   | 194.4 | 15 | 5 | Pos |
| Phenylalanine ISTD       | 176.1 | 129.1 | 168.6 | 10 | 5 | Pos |
| Proline ISTD             | 122.1 | 75.1  | 208.8 | 14 | 5 | Pos |
| Propionylcarnitine ISTD  | 221.2 | 85.1  | 120   | 20 | 5 | Pos |
| Serine ISTD              | 110.2 | 63.1  | 279.6 | 8  | 3 | Pos |
| Spermidine ISTD          | 150.2 | 76.1  | 201.6 | 15 | 5 | Pos |
| TDCA ISTD                | 502.2 | 124.2 | 103.2 | 57 | 7 | Neg |
| Threonine ISTD           | 125.1 | 78.1  | 259   | 10 | 7 | Pos |
| Tyrosine ISTD            | 192.1 | 98.1  | 224.4 | 30 | 7 | Pos |
| UA ISTD                  | 169   | 125.1 | 214.8 | 13 | 3 | Neg |
| Valine ISTD              | 123.1 | 76.1  | 208.8 | 15 | 5 | Pos |
| Xanthine ISTD            | 153.1 | 109.1 | 126   | 18 | 5 | Neg |

---



**Table S2:** Detailed composition of the test meals (TM) and standardized meals (SM).

|                        | Quantity<br>(g) | Energy<br>(kcal) | Protein<br>(g) | Fat<br>(g)  | CHO<br>(g)  | Fiber<br>(g) | Available<br>CHO (g) |
|------------------------|-----------------|------------------|----------------|-------------|-------------|--------------|----------------------|
| <b>TM High GI (92)</b> |                 |                  |                |             |             |              |                      |
| Glutinous rice         | 100.7           | 356.6            | 7.7            | 2.3         | 76.1        | 1.0          | 75.1                 |
| Chicken seasoning      | 2.0             | 4.5              | 0.3            | 0.1         | 0.7         | 0            | 0.7                  |
| Green leafy vegetables | 20.0            | 6.9              | 0.6            | 0.4         | 0.3         | 0.1          | 0.2                  |
| <b>TOTAL</b>           | <b>122.7</b>    | <b>368.0</b>     | <b>8.5</b>     | <b>2.7</b>  | <b>77.1</b> | <b>1.1</b>   | <b>76.0</b>          |
| <b>TM Low GI (55)</b>  |                 |                  |                |             |             |              |                      |
| Parboiled Basmati rice | 99.8            | 349.1            | 9.4            | 0.7         | 76.4        | 1.4          | 75.0                 |
| Chicken seasoning      | 2.0             | 4.5              | 0.3            | 0.1         | 0.7         | 0            | 0.7                  |
| Green leafy vegetables | 20.0            | 6.9              | 0.6            | 0.4         | 0.3         | 0.1          | 0.2                  |
| <b>TOTAL</b>           | <b>121.8</b>    | <b>360.5</b>     | <b>10.2</b>    | <b>1.1</b>  | <b>77.4</b> | <b>1.5</b>   | <b>75.9</b>          |
| <b>SM</b>              |                 |                  |                |             |             |              |                      |
| Shrimp wanton soup     | 145.0           | 132.0            | 8.1            | 3.0         | 18.0        | 2.8          | 15.2                 |
| Soya milk              | 300.0           | 162.0            | 6.3            | 3.3         | 26.4        | 1.8          | 24.6                 |
| Soybeans- based snack  | 27.0            | 111.0            | 4.3            | 5.5         | 11.0        | 2.5          | 8.5                  |
| Almond nuts            | 40.0            | 233.0            | 9.2            | 19.5        | 5.3         | 4.3          | 1.1                  |
| Banana                 | 125.0           | 110.0            | 1.0            | 0.0         | 30.0        | 3.0          | 27.0                 |
| <b>TOTAL</b>           | <b>637.0</b>    | <b>748.0</b>     | <b>28.9</b>    | <b>31.3</b> | <b>90.7</b> | <b>14.4</b>  | <b>76.4</b>          |

The meals immediately prior to the test meals were standardized, i.e. the dinner prior to the breakfast test sessions and the lunch prior to the dinner test sessions. CHO: carbohydrate; GI: glycemic index; TM: test meal; SM: standard meal.

**Figure S2.** Level-time line plots of the metabolites with significant  $p$ -values (HI-DI: high-GI dinner; LO-DI: low-GI dinner; HI-BR: high-GI breakfast; LO-BR: low-GI breakfast).

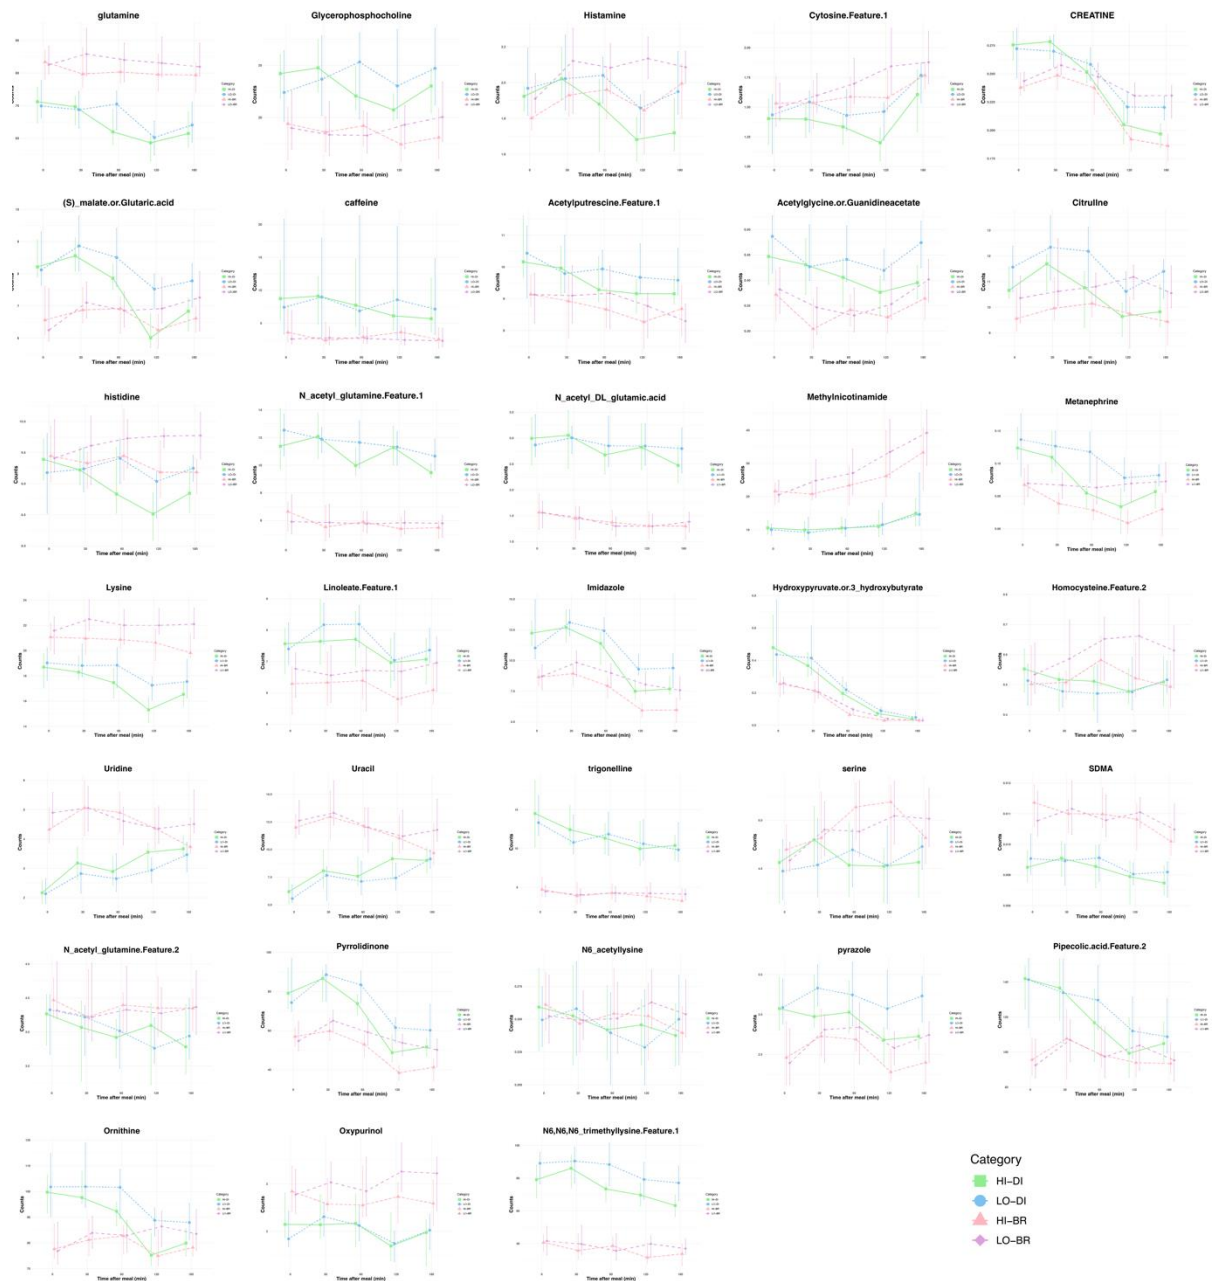

[illegible]

1. Teo, G.; Chew, W.S.; Burla, B.J.; Herr, D.; Tai, E.S.; Wenk, M.R.; Torta, F.; Choi, H. MRMkit: Automated Data Processing for Large-Scale Targeted Metabolomics Analysis. *Anal Chem* **2020**, *92*, 13677-13682, doi:10.1021/acs.analchem.0c03060.
2. Broadhurst, D.; Goodacre, R.; Reinke, S.N.; Kuligowski, J.; Wilson, I.D.; Lewis, M.R.; Dunn, W.B. Guidelines and considerations for the use of system suitability and quality control samples in mass spectrometry assays applied in untargeted clinical metabolomic studies. *Metabolomics* **2018**, *14*, 72, doi:10.1007/s11306-018-1367-3.
